# Supplementary material
Source: Springer Nature journal article supplement (https://www.springermedizin.de/resource/supplementary/12885_2013_4714_MOESM5_ESM.pdf/9467112)
Supplement: MOESM5 [file 9467112]

**Additional File 5.**

**Title:** Putative pathways enriched with the miRNAs included in the sub-node 15 and 63.

**Description:** Code between brackets refers to the pathway code on KEGG, hsa means *homo sapiens*. FDR refers to p-value adjusted by False Discovery Rate. 20 miRNAs were included in a pathway enrichment analysis and obtained the genes union results.

**Additional File 5.** Putative pathways enriched with the miRNAs included in the sub-node 15 and 63

| KEGG pathway (hsa)                                                | Number of miR | FDR                    | Number of genes |
|-------------------------------------------------------------------|---------------|------------------------|-----------------|
| ECM-receptor interaction (hsa04512)                               | 14            | $1.60 \times 10^{-13}$ | 33              |
| Endocytosis (hsa04144)                                            | 15            | $3.17 \times 10^{-7}$  | 67              |
| Glycosaminoglycan biosynthesis – heparan sulfate (hsa00534)       | 6             | $1.62 \times 10^{-6}$  | 8               |
| Adherens junction (hsa04520)                                      | 13            | $3.76 \times 10^{-5}$  | 26              |
| Circadian rhythm - mammal (hsa04710)                              | 9             | $5.88 \times 10^{-5}$  | 11              |
| Focal adhesion (hsa04510)                                         | 16            | $5.88 \times 10^{-5}$  | 67              |
| Axon guidance (hsa04360)                                          | 13            | $3.92 \times 10^{-4}$  | 41              |
| Biotin metabolism (hsa00780)                                      | 1             | $3.97 \times 10^{-4}$  | 1               |
| Arrhythmogenic right ventricular cardiomyopathy (ARVC) (hsa05412) | 13            | $1.92 \times 10^{-3}$  | 26              |
| Long-term depression (hsa04730)                                   | 12            | $2.19 \times 10^{-2}$  | 22              |
| Cell adhesion molecules (CAMs) (hsa04514)                         | 13            | $2.19 \times 10^{-2}$  | 34              |
| Dilated cardiomyopathy (hsa05414)                                 | 16            | $2.19 \times 10^{-2}$  | 30              |
| Fc gamma R-mediated phagocytosis (hsa04666)                       | 9             | $2.96 \times 10^{-2}$  | 30              |
| Hypertrophic cardiomyopathy (HCM) (hsa05410)                      | 15            | $4.54 \times 10^{-2}$  | 27              |
| MAPK signaling pathway (hsa04010)                                 | 16            | $4.54 \times 10^{-2}$  | 7267            |
| Aldosterone-regulated sodium reabsorption (hsa04960)              | 11            | $4.69 \times 10^{-2}$  | 16              |
| Regulation of actin cytoskeleton (hsa04810)                       | 15            | $4.69 \times 10^{-2}$  | 56              |

Code between brackets refers to the pathway code on KEGG, hsa means *homo sapiens*. FDR refers to p-value adjusted by False Discovery Rate. 20 miRNAs were included in a pathway enrichment analysis and obtained the genes union results.
